# Supplementary material for: The HSP90 Inhibitor NVP-AUY922 Radiosensitizes by Abrogation of Homologous Recombination Resulting in Mitotic Entry with Unresolved DNA Damage
Source: PubMed Central journal article supplement (PMC3327673; doi:10.1371/journal.pone.0035436), 2012-04-16

**A**

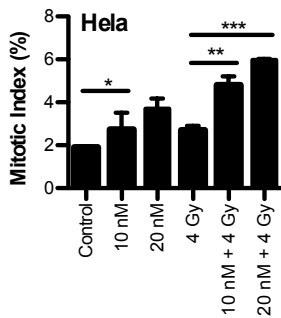

**B**

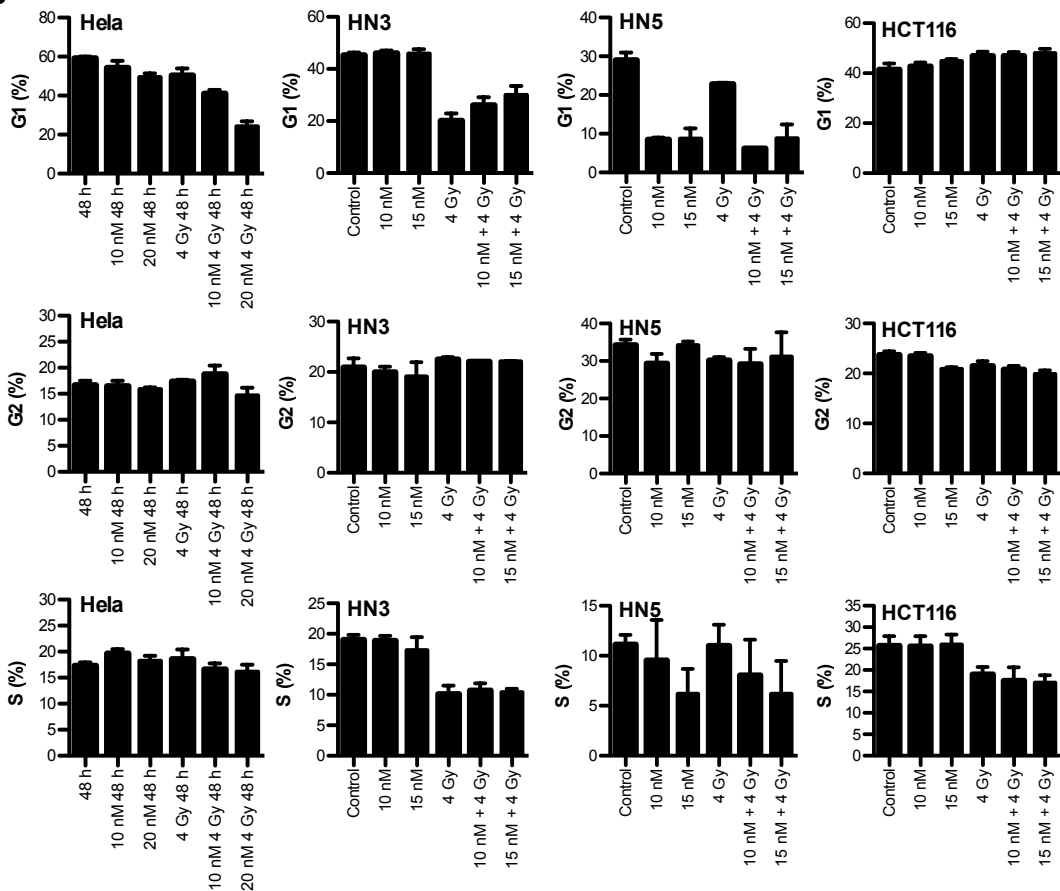

Supplement: pone.0035436.s005.pdf [file pone.0035436.s005.pdf]
